# Albumin to gamma-glutamyltransferase ratio as a prognostic indicator in intrahepatic cholangiocarcinoma after curative resection

Chu-Yu Jing<sup>1,\*</sup>, Yi-Peng Fu<sup>1,\*</sup>, Hu-Jia Shen<sup>1,\*</sup>, Su-Su Zheng<sup>1</sup>, Jia-Jia Lin<sup>1</sup>, Yong Yi<sup>1</sup>, Jin-Long Huang<sup>1</sup>, Xin Xu<sup>1</sup>, Juan Zhang<sup>1</sup>, Jian Zhou<sup>1</sup>, Jia Fan<sup>1</sup>, Zheng-Gang Ren<sup>1</sup>, Shuang-Jian Qiu<sup>1</sup>, Bo-Heng Zhang<sup>1</sup>

<sup>1</sup>The Liver Cancer Institute, Zhongshan Hospital and Shanghai Medical School, Fudan University, Key Laboratory for Carcinogenesis and Cancer Invasion, The Chinese Ministry of Education, Shanghai, P.R. China.

\*These authors have contributed equally to this work

**Correspondence to:** Bo-Heng Zhang, **email:** zhang.boheng@zs-hospital.sh.cn

**Keywords:** albumin, gamma-glutamyltransferase, intrahepatic cholangiocarcinoma, prognosis, nomogram

**Received:** September 06, 2016

**Accepted:** December 27, 2016

**Published:** January 05, 2017

## ABSTRACT

The prognosis of intrahepatic cholangiocarcinoma (ICC) remains poor whereas predictive models for survival prediction in ICC patients following curative resection are limited. Herein, we established a novel inflammation-based score derived from preoperative albumin to gamma-glutamyltransferase ratio (AGR) and evaluated its prognostic significance in ICC patients underwent curative resection. Prognostic value of AGR was retrospectively studied in a cohort comprising 206 ICC patients following curative resection. The predictive performance of AGR was compared with other inflammation-based scores and serological tumor markers in terms of concordance index (C-index). Further, prognostic nomograms incorporating AGR into the tumor-node-metastasis (TNM) staging systems were established to achieve a better discriminatory ability. The optimal cut-off value of AGR was 0.6. Multivariate analysis showed that AGR was an independent predictor for overall survival (OS;  $P = 0.003$ ) and recurrence-free survival (RFS;  $P = 0.046$ ). The C-index of AGR was superior to other inflammation-based scores and serological tumor markers in OS and RFS prediction. The established nomograms showed improved predictive accuracy compared with the TNM staging systems alone. These results indicate that AGR is an independent prognostic indicator for ICC underwent curative resection. The incorporation of AGR into the existing TNM staging systems achieved improved predictive accuracy.

## INTRODUCTION

Intrahepatic cholangiocarcinoma (ICC), marked by poor survival, is an epithelial malignancy arising from intrahepatic biliary tracts [1]. As a historically uncommon disease, ICC, which accounts for 5% to 10% of all cholangiocarcinoma [2], is attracting growing attention due to its steadily rising incidence and mortality across all continents [3]. Surgical resection is the only treatment potential for a cure [4]. However, even for patients underwent curative resection, survival remains dismal along with a 5-year survival rate of around 30% [5]. Therefore, clinically easy-accessible and individualized prognostic

markers or scoring systems to stratify the prognosis in ICC patients following curative resection are urgently needed.

The commonly used staging systems for ICC were tumor-node-metastasis (TNM) staging systems, such as the American Joint Committee on Cancer (AJCC) seventh edition [6], the Liver Cancer Study Group of Japan (LCSGJ) system [7], the Okabayashi system [8] and the Nathan system [9]. Among the staging systems, issues on whether tumor diameter was an independent prognostic indicator, whether other non-TNM factors should be included and which staging system performed better in risk stratification remained controversial [9, 10]. Moreover, all these models were cumbersome and

not specifically formulated for post-operative prognostic prediction.

Accumulating evidence showed that, on the basis of tissue damage, inflammation paved the way for carcinogenesis [11, 12]. The well-established risk factors of ICC, such as liver flukes, hepatolithiasis, primary sclerosing cholangitis, which caused chronic inflammations in the liver, indicated that inflammation was strongly correlated with the carcinogenesis of ICC [13]. In addition, studies based on our institutional data identified inflammation-based scores such as neutrophil to lymphocyte ratio (NLR), platelet to lymphocyte ratio (PLR) as prognostic factors in ICC [14, 15]. It is therefore reasonable to dig further into inflammation-based scores for the prognostic prediction in patients with ICC.

Gamma-glutamyltransferase (GGT) is an enzyme which is ubiquitously expressed on the surface of the epithelial cells that line glands and ducts. Historically, serum GGT level was a common indicator for hepatobiliary disease reflecting bile duct damage, the progression of liver cirrhosis and chronic hepatitis [16, 17]. Recent data suggested that higher serum GGT within the normal range was an early marker of oxidative stress and an indicator of higher cancer risk [18, 19]. Additionally, elevated serum GGT level was identified as an independent risk factor for poor prognosis in several cancer types, such as endometrial carcinoma and cervical cancer [20, 21]. Consistent with those studies, our previous studies proved elevated serum GGT level to be an independent predictor of poor survival in ICC and hepatocellular carcinoma (HCC) [22–24].

Albumin is a stable molecule synthesized by the hepatocytes which maintains the intravascular colloid oncotic pressure and transports various substances [25]. In clinic, hypoalbuminemia is a common indicator for malnutrition and liver dysfunction [26]. Under systemic inflammation, albumin serves as a protective agent that scavenges the reactive oxygen and nitrogen species, whereas the synthesis of albumin declined [26–28]. Previous studies showed that albumin alone or albumin-based markers were independent predictors of poor survival in several cancers [29–32]. In addition, a preclinical study demonstrated that albumin suppressed the proliferation of HCC cell lines [33]. Taken together, higher serum albumin levels were considered a protective factor for cancer patients.

As alluded to above, elevated GGT not only reflects hepatobiliary inflammation and underlying liver damage, but also is a marker of oxidative stress which indicates higher cancer risk and poor prognosis, whereas declined albumin level implies impaired liver function, malnutrition, severe inflammation and incompetency in eliminating oxidative stress. Hence, it is logic to propose albumin to gamma-glutamyltransferase ratio (AGR), a combination of liver function parameters which reflects the status of oxidative stress as well, as a novel inflammatory marker in the prognostic prediction for post-operative patients with ICC.

The goal of this study was to assess the prognostic value of AGR in patients with ICC following curative resection. Further, we aimed to compare the discriminative ability of AGR with other inflammation scores and conventional serological tumor markers to ascertain the feasibility of AGR as a prognostic indicator. Additionally, we tried to refine the existing staging systems by establishing a nomogram incorporating AGR into the existing TNM staging systems.

## RESULTS

### Clinicopathological profiles of the patients

The clinicopathological characteristics of the patients are detailed in Table 1. According to the AJCC manual 7th edition, the numbers of patients classified into stage I, II, III and IVa were 93, 60, 18 and 35, respectively. The numbers of patients classified into stage I, II, III and IVa based on LCSGJ staging system were 5, 93, 57 and 51, respectively. The median follow-up time was 18 months (range, 1–69 months). The 1-, 3-, 5-year OS and RFS rates were 73.1%, 49.1%, 38.0% and 55.2%, 32.1%, 23.0%, respectively.

### Relationship between AGR and patient characteristics

The median value of AGR was 0.64 (range, 0.03–3.0). The optimal cut-off value of AGR was 0.6 for survival prediction. Likewise, the cut-off values of other inflammation-based scores were listed in Table 1.

All these patients were classified into 2 groups via AGR: a low-risk group ( $AGR \geq 0.6$ ,  $n = 108$ ) and a high-risk group ( $AGR < 0.6$ ,  $n = 98$ ). The clinicopathological characteristics for each group are listed in Table 2. The high-risk AGR group was presented with higher Child-Pugh grade ( $P = 0.01$ ), higher albumin-bilirubin (ALBI) grade ( $P = 0.001$ ) [34, 35], elevated alanine transaminase (ALT;  $P < 0.001$ ), alkaline phosphatase (ALP;  $P < 0.001$ ), carbohydrate antigen 19-9 (CA19-9;  $P = 0.001$ ) and carcinoembryonic antigen (CEA;  $P = 0.008$ ) levels, larger tumor size ( $P = 0.001$ ), multiple tumors ( $P = 0.03$ ), the presence of lymph node metastasis ( $P = 0.001$ ) and advanced TNM stage ( $P < 0.001$ ).

### Prognostic significance of AGR

AGR less than 0.6 was associated with significant poor prognosis in terms of OS and RFS ( $P < 0.001$  for OS;  $P = 0.001$  for RFS; Figure 1). The 1-, 3- and 5-year OS rates for low-risk AGR group and high-risk AGR group were 85.4%, 69.0%, 56.1% and 59.7%, 26.9%, 18.1%, respectively. The 1-, 3- and 5-year RFS rates for low-risk AGR group and high-risk AGR group were 66.6%, 37.9%, 25.3% and 42.5%, 22.9%, 22.9%, respectively.

**Table 1: Clinicopathological characteristics of patients with ICC: univariate and multivariate analysis**

| Variables                                                  | Patients<br>(n = 206) | OS                    |                         |                            | RFS                   |                         |                            |
|------------------------------------------------------------|-----------------------|-----------------------|-------------------------|----------------------------|-----------------------|-------------------------|----------------------------|
|                                                            |                       | Univariate<br>P-value | Multivariate<br>P-value | Multivariate HR<br>(95%CI) | Univariate<br>P-value | Multivariate<br>P-value | Multivariate HR<br>(95%CI) |
| Gender, male/female                                        | 126/80                | 0.960                 | NA                      |                            | 0.182                 | NA                      |                            |
| Age, years (median, range)                                 | 60, 28–85             | 0.800                 | NA                      |                            | 0.403                 | NA                      |                            |
| Liver cirrhosis, absent/present                            | 170/36                | 0.320                 | NA                      |                            | 0.997                 | NA                      |                            |
| ALBI score, 1/2                                            | 151/55                | 0.106                 | NA                      |                            | 0.752                 | NA                      |                            |
| Child Pugh grade, A/B/unknown                              | 192/6/8               | 0.737                 | NA                      |                            | 0.183                 | NA                      |                            |
| HBsAg, negative/positive                                   | 131/75                | <b>0.027</b>          | NS                      |                            | 0.135                 | NA                      |                            |
| Tumor size, ≤ 5/> 5cm                                      | 89/117                | <b>0.022</b>          | NS                      |                            | <b>0.026</b>          | NS                      |                            |
| Edmondson–Steiner classification, I–II/III–IV/unknown      | 170/30/6              | 0.761                 | NA                      |                            | 0.389                 | NA                      |                            |
| Tumor number, single/multiple                              | 153/53                | <b>&lt; 0.001</b>     | <b>&lt; 0.001</b>       | 2.520 (1.641–3.872)        | <b>0.001</b>          | <b>0.006</b>            | 1.790 (1.183–2.708)        |
| Direct invasion and local extrahepatic metastasis, no/yes* | 184/22                | <b>0.013</b>          | NA                      |                            | 0.453                 | NA                      |                            |
| Lymph node metastasis, no/yes                              | 171/35                | <b>&lt; 0.001</b>     | <b>&lt; 0.001</b>       | 2.978 (1.853–4.788)        | <b>&lt; 0.001</b>     | <b>0.004</b>            | 1.974 (1.235–3.153)        |
| MVI, no/yes                                                | 156/50                | <b>0.004</b>          | NS                      |                            | <b>0.01</b>           | <b>0.04</b>             | 1.539 (1.020–2.323)        |
| <b>Conventional blood parameters</b>                       |                       |                       |                         |                            |                       |                         |                            |
| TBIL, ≤ 20.4/> 20.4 μmol/L                                 | 187/19                | 0.165                 | NA                      |                            | 0.906                 | NA                      |                            |
| Albumin, g/L (median, range)                               | 41, 28 - 51           | <b>0.008</b>          | NS                      |                            | 0.833                 | NA                      |                            |
| Albumin, < 35/≥ 35 g/L                                     | 11/195                | <b>0.007</b>          | NS                      |                            | 0.332                 | NA                      |                            |
| GGT, ≤ 60/> 60 U/L                                         | 94/112                | <b>&lt; 0.001</b>     | NS                      |                            | <b>0.002</b>          | NS                      |                            |
| ALT, ≤ 50/> 50 U/L                                         | 173/33                | 0.122                 | NA                      |                            | <b>0.047</b>          | NS                      |                            |
| ALP, ≤ 125/> 125 U/L                                       | 152/54                | <b>0.022</b>          | NS                      |                            | 0.099                 | NA                      |                            |
| CA19-9, < 37/≥ 37 U/L/unknown                              | 97/104/5              | <b>0.007</b>          | NS                      |                            | 0.26                  | NA                      |                            |
| AFP, < 20/≥ 20 ng/mL/unknown                               | 183/18/5              | <b>0.042</b>          | NS                      |                            | <b>0.048</b>          | NS                      |                            |
| CEA, < 5/≥ 5 ng/mL/unknown                                 | 160/41/5              | <b>0.001</b>          | NS                      |                            | 0.055                 | NA                      |                            |
| <b>Inflammatory parameters</b>                             |                       |                       |                         |                            |                       |                         |                            |
| GPR, ≤ 0.5/> 0.5                                           | 132/74                | <b>0.001</b>          | NS                      |                            | <b>0.012</b>          | NS                      |                            |
| AAPR, ≥ 0.5/< 0.5                                          | 66/140                | <b>&lt; 0.001</b>     | NS                      |                            | <b>0.003</b>          | NS                      |                            |
| GAR, ≤ 3.5/> 3.5                                           | 120/86                | <b>&lt; 0.001</b>     | NS                      |                            | 0.054                 | NA                      |                            |
| PNI, ≥ 45/< 45                                             | 169/37                | <b>0.016</b>          | NS                      |                            | 0.726                 | NA                      |                            |
| PLR, ≤ 175/>175                                            | 177/29                | <b>0.012</b>          | NS                      |                            | 0.472                 | NA                      |                            |
| NLR, ≤ 2.8/> 2.8                                           | 130/76                | <b>&lt; 0.001</b>     | <b>0.004</b>            | 1.889 (1.222–2.919)        | 0.123                 | NA                      |                            |
| AGR, ≥ 0.6/< 0.6                                           | 108/98                | <b>&lt; 0.001</b>     | <b>0.003</b>            | 2.011 (1.268–3.189)        | <b>0.001</b>          | <b>0.046</b>            | 1.477 (1.007–2.164)        |
| <b>Conventional staging systems</b>                        |                       |                       |                         |                            |                       |                         |                            |
| LCSGJ stage, I–II/III/IVa                                  | 98/57/51              | <b>&lt; 0.001</b>     | NA                      |                            | <b>&lt; 0.001</b>     | NA                      |                            |
| AJCC 7th edition, I/II/III/IVa                             | 93/60/18/35           | <b>&lt; 0.001</b>     | NA                      |                            | <b>&lt; 0.001</b>     | NA                      |                            |

Abbreviations: OS, overall survival; RFS, recurrence-free survival; HBsAg, hepatitis B surface antigen; ALBI, albumin-bilirubin; MVI, microvascular invasion; TBIL, total bilirubin; ALT, alanine transaminase; GGT, gamma-glutamyltransferase; ALP, alkaline phosphatase; AFP, Alpha-fetoprotein; CEA, carcinoembryonic antigen; GPR, gamma-glutamyltransferase to platelet ratio; AAPR, albumin to alkaline phosphatase ratio; GAR, gamma-glutamyltransferase to alanine aminotransferase ratio; PNI, the prognostic nutritional index; PLR, platelet to lymphocyte ratio; NLR, neutrophil-to-lymphocyte ratio; AGR, albumin to gamma-glutamyltransferase ratio. \*Direct invasion and local extrahepatic metastasis, included invasion of gallbladder, adrenal gland and diaphragm; LCSGJ, the Liver Cancer Study Group of Japan; AJCC, American Joint Committee on Cancer; P-value < 0.05 marked in bold font shows statistical significant.

In univariate analysis for OS, Hepatitis B surface antigen positive (HBsAg;  $P = 0.027$ ), larger tumor size ( $P = 0.022$ ), multiple tumors ( $P < 0.001$ ), presence of direct invasion and local extrahepatic metastasis ( $P = 0.013$ ),

lymph node metastasis ( $P < 0.001$ ), microvascular invasion (MVI) ( $P = 0.004$ ), declined serum albumin ( $P = 0.008$ ) level, elevated serum GGT ( $P < 0.001$ ), ALP ( $P = 0.022$ ), CA19-9 ( $P = 0.007$ ), alpha-fetoprotein (AFP;  $P = 0.042$ )

**Table 2: Correlation between AGR and clinicopathological variables of patients with ICC**

| Variables                                                          | AGR $\geq 0.6$ ( <i>n</i> = 108) | AGR $< 0.6$ ( <i>n</i> = 98) | <i>P</i> -value   |
|--------------------------------------------------------------------|----------------------------------|------------------------------|-------------------|
| Gender, female/male                                                | 49/59                            | 31/67                        | <b>0.043</b>      |
| Age, years (median, range)                                         | 61, 28–85                        | 60, 35–79                    | 0.722             |
| Liver cirrhosis, absent/present                                    | 89/19                            | 81/17                        | 0.963             |
| ALBI score, 1/2                                                    | 90/18                            | 61/37                        | <b>0.001</b>      |
| Child-Pugh grade, A/B/unknown                                      | 105/0/3                          | 87/6/5                       | <b>0.01</b>       |
| TBIL, $\leq 20.4 / > 20.4$ $\mu\text{mol/L}$                       | 102/6                            | 85/13                        | 0.056             |
| ALT, $\leq 50 / > 50$ U/L                                          | 105/3                            | 68/30                        | <b>&lt; 0.001</b> |
| ALP, $\leq 125 / > 125$ U/L                                        | 100/8                            | 52/46                        | <b>&lt; 0.001</b> |
| Albumin, $< 35 / \geq 35$ g/L                                      | 3/105                            | 8/90                         | 0.086             |
| GGT, $\leq 60 / > 60$ U/L                                          | 94/14                            | 0/98                         | <b>&lt; 0.001</b> |
| CA19-9, $< 37 / \geq 37$ U/L/unknown                               | 63/43/2                          | 34/61/3                      | <b>0.001</b>      |
| AFP, $< 20 / \geq 20$ ng/mL/unknown                                | 97/9/2                           | 86/9/3                       | 0.807             |
| CEA, $< 5 / \geq 5$ ng/mL/unknown                                  | 92/14/2                          | 68/27/3                      | <b>0.008</b>      |
| Tumor size, $\leq 5 / > 5$ cm                                      | 59/49                            | 30/68                        | <b>0.001</b>      |
| Edmondson–Steiner classification, I–II/III–IV/unknown              | 92/14/2                          | 78/16/4                      | 0.601             |
| Tumor number, single/multiple                                      | 87/21                            | 66/32                        | <b>0.03</b>       |
| *Direct invasion and local extrahepatic metastasis, absent/present | 100/8                            | 84/14                        | 0.11              |
| Lymph node metastasis, absent/present                              | 99/9                             | 72/26                        | <b>0.001</b>      |
| MVI, absent/present                                                | 85/23                            | 71/27                        | 0.296             |
| AJCC 7th edition, I/II/III/IVa                                     | 65/26/8/9                        | 28/34/10/26                  | <b>&lt; 0.001</b> |
| LCSGJ stage, I–II/III/IVa                                          | 67/29/12                         | 31/28/39                     | <b>&lt; 0.001</b> |

Abbreviations: AGR, albumin to gamma-glutamyltransferase ratio; ALBI, albumin-bilirubin; TBIL, total bilirubin; ALT, alanine transaminase; ALP, alkaline phosphatase; AFP, alpha-fetoprotein; CEA, carcinoembryonic antigen; MVI, microvascular invasion; AJCC, American Joint Committee on Cancer; LCSGJ, the Liver Cancer Study Group of Japan; \*Direct invasion and local extrahepatic metastasis, included invasion of gallbladder, adrenal gland and diaphragm. *P*-value  $< 0.05$  marked in bold font shows statistical significant.

and CEA ( $P = 0.001$ ) levels, GGT to platelet ratio (GPR;  $P = 0.001$ ) [17], albumin to ALP ratio (AAPR;  $P < 0.001$ ) [29], GGT to ALT ratio (GAR;  $P < 0.001$ ) [23], prognostic nutritional index (PNI;  $P = 0.016$ ) [36], PLR ( $P = 0.012$ ), NLR ( $P < 0.001$ ), AGR ( $P < 0.001$ ) and advanced TNM stage ( $P < 0.001$  for both AJCC 7th edition and LCSGJ stage) were identified as significant predictors (Table 1). In multivariate analysis for OS, multiple tumors ( $P < 0.001$ , hazard ratio [HR] = 2.520; 95% confidential interval [CI] 1.641–3.872), presence of lymph node metastasis ( $P < 0.001$ , HR = 2.978; 95%CI 1.853–4.788), elevated NLR level ( $P = 0.004$ , HR = 1.889; 95%CI 1.222–2.919) and declined AGR ( $P = 0.003$ , HR = 2.011; 95%CI 1.268–3.189) level remained as independent indicators for OS.

In univariate analysis for RFS, larger tumor size ( $P = 0.026$ ), multiple tumors ( $P = 0.001$ ), presence of lymph node metastasis ( $P < 0.001$ ) and MVI ( $P = 0.01$ ), elevated ALT ( $P = 0.047$ ), GGT ( $P = 0.002$ ) and AFP ( $P = 0.048$ ) levels, elevated GPR ( $P = 0.012$ ), declined AAPR ( $P = 0.003$ ) and AGR ( $P = 0.001$ ) levels, and advanced TNM stage ( $P < 0.001$  for both AJCC 7th edition and LCSGJ stage) were identified as risk factors for recurrence. In multivariate analysis for RFS, multiple tumors ( $P = 0.006$ , HR = 1.790; 95%CI 1.183–2.708), presence of lymph node metastasis ( $P = 0.004$ , HR = 1.974; 95%CI 1.235–3.153), MVI ( $P = 0.04$ , HR = 1.539; 95%CI 1.020–2.323) and decreased AGR ( $P = 0.046$ , HR = 1.477; 95%CI 1.007–2.164) remained as independent predictors.

To explore whether liver cirrhosis and hepatic function can affect the prognostic performance of AGR, subgroup analyses were performed. In ICC patients without liver cirrhosis, AGR can stratify both OS (Supplementary Figure 1A;  $P < 0.001$ ) and RFS (Supplementary Figure 1C;  $P = 0.001$ ). In ICC patients with liver cirrhosis, AGR was a prognostic indicator for OS (Supplementary Figure 1B;  $P = 0.002$ ) but not for RFS (Supplementary Figure 1D;  $P = 0.239$ ). Moreover, as illustrated in Supplementary Figure 2, AGR can stratify the OS and RFS in both ALBI grade I patients ( $P < 0.001$  for OS;  $P = 0.002$  for RFS) and ALBI grade II patients ( $P = 0.023$  for OS;  $P = 0.04$  for RFS). Taken together, AGR remained a prognostic indicator in ICC patients with different grades of hepatic function and liver cirrhosis.

### Comparative performance of AGR and other predictive models

The discriminatory capabilities of AGR, other inflammation-based scores, serological tumor markers and conventional staging systems evaluated by concordance index (C-index) were shown in Table 3. The C-indices of AGR for OS and RFS prediction were 0.646 (95%CI 0.638–0.653) and 0.600 (95%CI 0.594–0.606), respectively. In terms of discriminatory capability, AGR outperformed other inflammation-based scores and conventional serological tumor markers in both OS and RFS prediction. Time-dependent receiver operating characteristic curve (ROC) showed that, compared with other inflammation-based scores and serological tumor markers, the area under the receiver operating characteristic curve (AUROC) of AGR was the highest for OS and RFS prediction for the most of the follow-up time (Figure 2; Supplementary Table 1).

The conventional TNM staging systems were superior to inflammation-based scores and serological tumor markers in both OS and RFS prediction. The C-indices for OS and RFS prediction of the AJCC 7th edition were 0.702 (95%CI 0.694–0.709) and 0.621 (95%CI 0.614–0.627), respectively.

The C-indices for OS and RFS prediction of the LCSGJ stage were 0.699 (95%CI 0.692–0.705) and 0.633 (95%CI 0.626–0.640), respectively. The predictive abilities of these two conventional TNM staging systems were not significantly different in our cohort.

### Prognostic nomograms integrating AGR and the conventional staging systems

The nomograms integrating the AGR and the AJCC 7th edition for OS and RFS prediction gave rise to higher C-indices than that of the AJCC 7th edition alone (Table 3; Figure 3).

The C-index of the nomogram in OS prediction was 0.736 (95%CI 0.730–0.743) compared with the AJCC 7th edition with a C-index of 0.702 (95%CI 0.694–0.709). The calibration curves showed good consistency between the observed OS and nomogram-calculated OS at 1, 3, 5 years after surgery.

The C-index of the nomogram in RFS prediction was 0.650 (95%CI 0.643–0.657) compared with the previous value of 0.621 (95%CI 0.614–0.627) for AJCC 7th edition alone. The calibration plot for the probabilities of 1-, 2- and 3-year RFS fitted well between the actual observation and the prediction of the nomogram.

On decision curve analysis (DCA), a novel evaluation method that highlights the clinical net benefit of prediction models [37], the nomograms, compared with the AJCC 7th edition, yielded superior net benefit across a wider range of threshold probabilities. Likewise, the nomograms integrating the AGR and the LCSGJ stage for OS and RFS prediction yielded higher predictive power in terms of C-index (Table 3; Supplementary Figure 3).

## DISCUSSION

In this study, we established AGR, a novel, easily accessible inflammation-based score derived from preoperative serum albumin and GGT levels, as a predictor

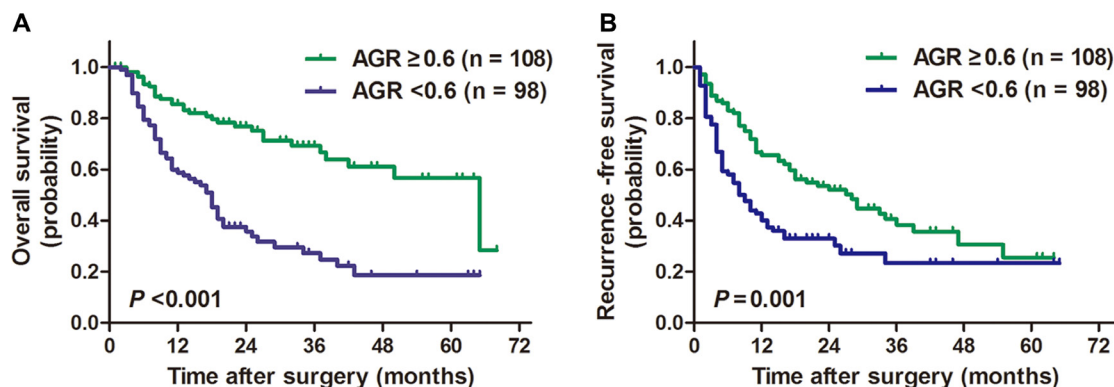

**Figure 1: Kaplan-Meier survival curves for patients with ICC stratified by AGR.** ICC patients with a preoperative AGR lower than 0.6 were associated with significantly poorer overall survival (A) and recurrence-free survival (B) compared with ICC patients with a preoperative AGR larger than 0.6.

**Table 3: Discriminatory capabilities of staging systems and blood parameters in patients with ICC: C-indices in OS and RFS prediction**

| Variables                            | OS      |             | RFS     |             |
|--------------------------------------|---------|-------------|---------|-------------|
|                                      | C-index | 95%CI       | C-index | 95%CI       |
| <b>Combined predictive models</b>    |         |             |         |             |
| Nomogram (AJCC 7th edition + AGR)    | 0.736   | 0.730–0.743 | 0.650   | 0.643–0.657 |
| Nomogram (LCSGJ + AGR)               | 0.731   | 0.724–0.738 | 0.658   | 0.651–0.664 |
| <b>Staging systems</b>               |         |             |         |             |
| AJCC 7th edition                     | 0.702   | 0.694–0.709 | 0.621   | 0.614–0.627 |
| LCSGJ stage                          | 0.699   | 0.692–0.705 | 0.633   | 0.626–0.640 |
| <b>Inflammation based scores</b>     |         |             |         |             |
| AGR ( $\geq 0.6 / < 0.6$ )           | 0.646   | 0.638–0.653 | 0.600   | 0.594–0.606 |
| GAR ( $\leq 3.5 / > 3.5$ )           | 0.614   | 0.606–0.624 | 0.553   | 0.549–0.559 |
| AAPR ( $\geq 0.5 / < 0.5$ )          | 0.608   | 0.601–0.614 | 0.522   | 0.517–0.527 |
| NLR ( $\leq 2.8 / > 2.8$ )           | 0.599   | 0.592–0.606 | 0.538   | 0.531–0.545 |
| GPR ( $\leq 0.5 / > 0.5$ )           | 0.598   | 0.590–0.605 | 0.559   | 0.553–0.565 |
| PNI ( $\geq 45 / < 45$ )             | 0.555   | 0.549–0.562 | 0.501   | 0.493–0.509 |
| PLR ( $\leq 175 / > 175$ )           | 0.545   | 0.539–0.550 | 0.514   | 0.509–0.519 |
| <b>Conventional blood parameters</b> |         |             |         |             |
| GGT ( $\leq 60 / > 60$ U/L)          | 0.621   | 0.613–0.628 | 0.599   | 0.593–0.605 |
| CEA ( $< 5 / \geq 5$ ng/mL)          | 0.579   | 0.571–0.585 | 0.555   | 0.548–0.561 |
| ALP ( $\leq 125 / > 125$ U/L)        | 0.567   | 0.560–0.574 | 0.549   | 0.543–0.555 |
| CA19-9 ( $< 37 / \geq 37$ U/L)       | 0.564   | 0.556–0.572 | 0.522   | 0.514–0.529 |
| AFP ( $< 20 / \geq 20$ ng/mL)        | 0.526   | 0.522–0.530 | 0.530   | 0.526–0.534 |

Abbreviations: OS, overall survival; RFS, recurrence-free survival; LCSGJ, the Liver Cancer Study Group of Japan; AJCC, American Joint Committee on Cancer; AGR, albumin to gamma-glutamyltransferase ratio; GAR, gamma-glutamyltransferase to alanine aminotransferase ratio; AAPR, albumin to alkaline phosphatase ratio; NLR, neutrophil to lymphocyte ratio; GPR, gamma-glutamyltransferase to platelet ratio; PNI, the prognostic nutritional index; PLR, platelet to lymphocyte ratio; GGT, gamma-glutamyltransferase; CEA, carcinoembryonic antigen; ALP, alkaline phosphatase; AFP, Alpha-fetoprotein. The staging systems, inflammation based scores and other blood parameters were ranked based on C-index of OS prediction.

for survival of patients with ICC following curative resection. Next, we showed that AGR outperformed other inflammation-based scores and conventional blood parameters including serological tumor markers in terms of discriminatory capacity. Furthermore, nomograms incorporating AGR and TNM staging systems including the LCSGJ stage and AJCC 7th edition showed improved predictive power relative to the TNM staging systems alone.

Oxidative stress, a main product of inflammation, can cause DNA damage and plays an important role in carcinogenesis in liver cancers [38, 39]. Physically, GGT is crucial in maintaining the level of intracellular glutathione, which protects the cell from oxidative damage [27].

Elevated serum GGT was an indicator of oxidative stress [18]. Albumin, on the contrary, provides abundant anti-oxidative substances and is proposed as a protective factor for cancer patients [40]. Therefore, AGR was more than an combination of liver function tests, as historically considered, but also a reasonable proxy for anti-oxidant balance and, furthermore, a potential prognostic indicator. In accordance with previous studies and our hypothesis, after stratifying patients into 2 groups according to the optimal cut-off value of AGR, the subgroup with lower AGR ( $< 0.6$ ) were associated with the following clinicopathological features: (1) higher Child-Pugh grade and higher ALBI score, which reflected impaired liver

function; (2) raised ALT, ALP, which were also commonly as indicators of inflammation; (3) elevated tumor markers (CEA, CA19-9), larger tumor size, multiple tumors, the presence of lymph node metastasis and advanced clinical stage. Additionally, decreased AGR was identified as an independent risk factor for OS and RFS in this cohort.

In recent decade, a series of inflammation-based scores emerged as robust prognostic indicators in various malignancies [14, 32, 41]. To the best of our knowledge, the existing staging systems and predictive models for ICC, including the above mentioned TNM staging systems and two nomograms [42, 43], lacked indicators of systemic inflammation and liver function, which could offer additional information in prognostic evaluation. In addition, our previous study revealed that inflammation based scores strengthened the predictive power of conventional staging systems in HCC [44]. It is therefore logic to expect the incorporation of AGR to improve the predictive performance of the existing staging systems of ICC. Herein, we incorporated AGR into AJCC and LCSGJ staging systems and showed that AGR refined the predictive accuracy of AJCC and LCSGJ staging systems in terms of C-index. The results were supportive of the integration of AGR into conventional staging systems for an improved discriminative ability.

Several shortcomings of this study should be addressed. Firstly, the study was retrospective in nature and the patients enrolled herein were from a single

institution of China, a country with different risk factors from western countries in the carcinogenesis of ICC [13]. Secondly, the study only contained patients underwent curative resection. Furthermore, due to the limited number of patients, an external validation was not performed. Therefore, future studies should be carried out to evaluate the prognostic significance of AGR in patients with different ethnic origin, advanced clinical stage and different treatment modalities.

In conclusion, these data suggested AGR, a novel and easy-accessible inflammation-based score, to be a robust indicator in prognostic prediction for ICC underwent curative resection. Furthermore, we confirmed that prognostic nomograms incorporating AGR into TNM staging systems provided improved predictive accuracy compared with the TNM staging systems alone.

## MATERIALS AND METHODS

### Patients

A total of 206 consecutive patients diagnosed with ICC presenting to Zhongshan Hospital, Fudan University and underwent curative resection from August 2005 to December 2014 were enrolled and retrospectively analyzed in this study. All of the enrolled patients met the inclusion criteria as follows: no preoperative anti-cancer treatments; no history and concurrence of other malignant

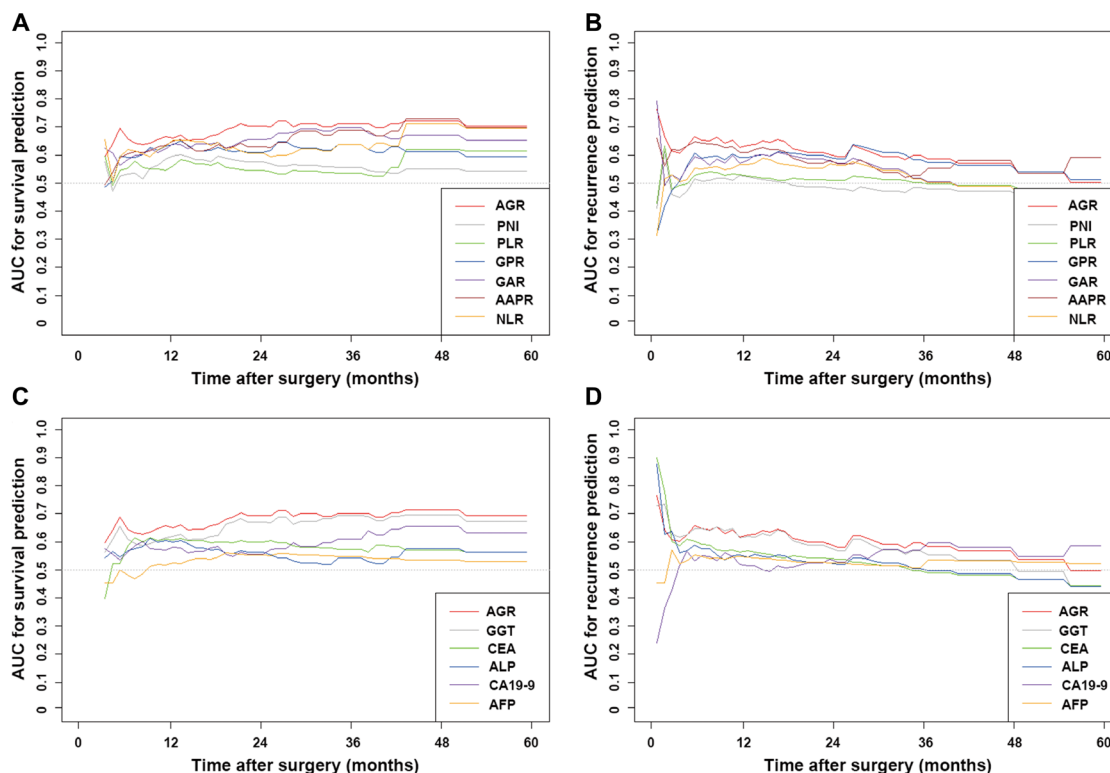

**Figure 2:** The time-dependent ROC curves of AGR, other inflammation-based scores and conventional blood parameters in death (A and C) and recurrence (B and D) prediction. Compared with other inflammation-based scores and serological tumor markers, the AUROC of AGR was the highest for death and recurrence prediction for the most of the follow-up time.

tumors; no history of decompensation due to the liver cirrhosis; histologically proven ICC; complete removal of macroscopic tumors, local extrahepatic metastatic lesions and histopathologically confirmed negative resection margin larger than 1cm; complete clinicopathological and follow-up data; no infectious manifestation or history of inflammatory disease other than viral hepatitis. Cases

with mixed cancers, tumor of uncertain origins or distant metastasis before the surgery were all excluded.

Laboratory tests including blood routine, albumin, ALT, GGT, ALP, AFP, CA19-9 and CEA were routinely performed within 3 days before the surgical resection. The hepatic function was assessed by the Child-Pugh classification and the ALBI grade [34]. The clinical staging

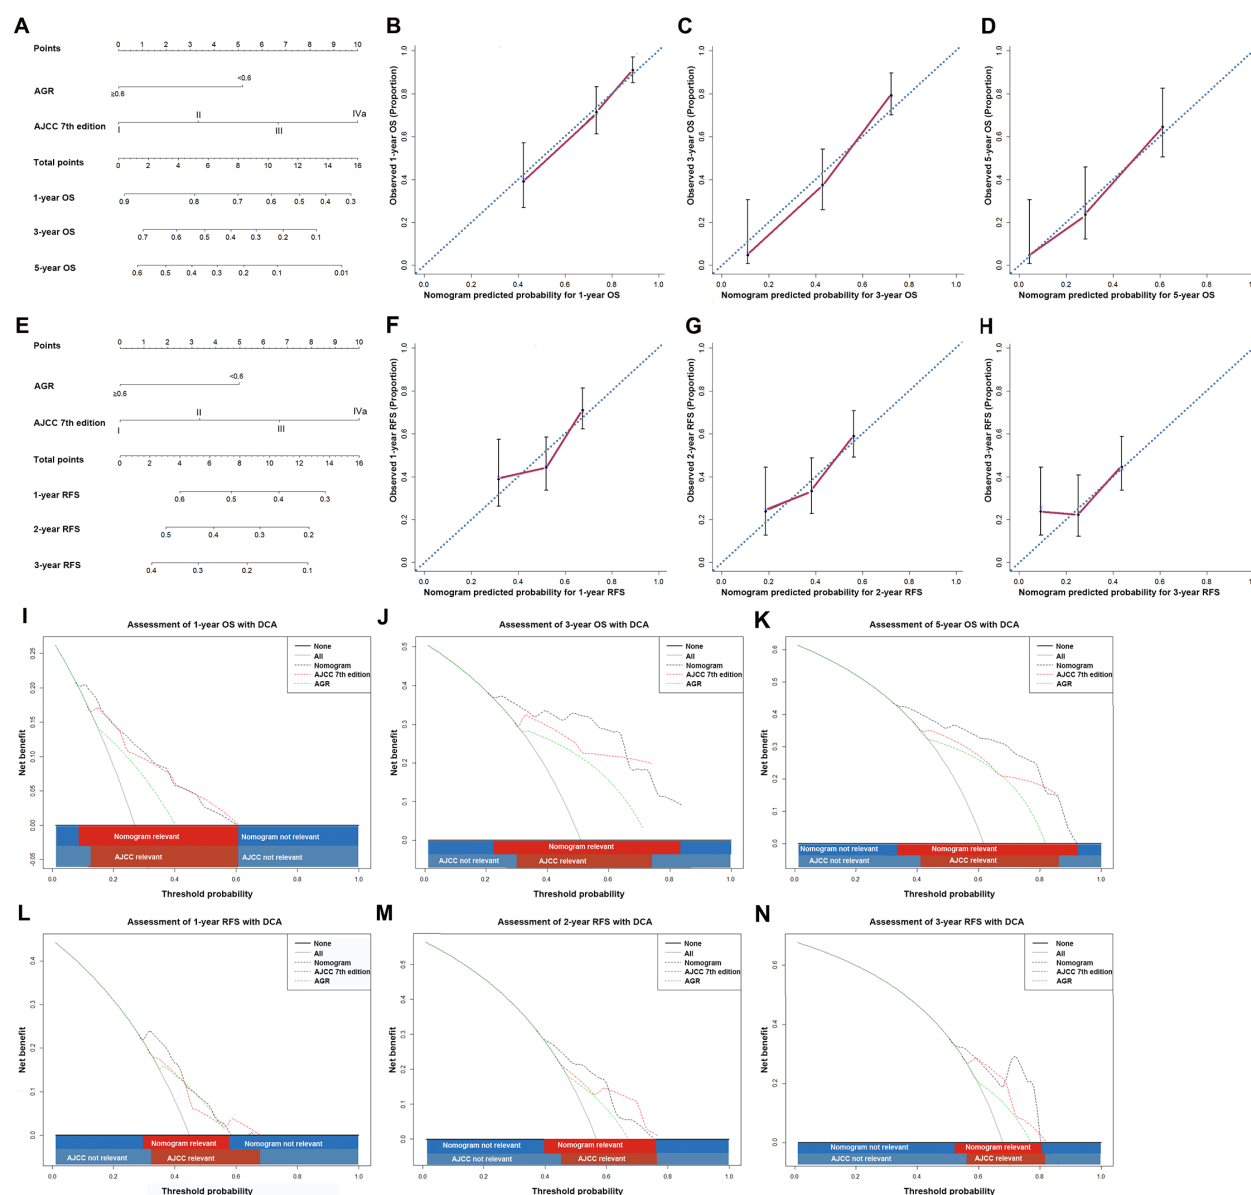

**Figure 3: ICC prognostic nomograms, calibration curves and decision curve analysis.** Nomograms predicting (A) OS and (E) RFS in patients with ICC (to use the nomogram, an individual patient's value is located on each variable axis, and a line is drawn upwards to determine the number of points received for each variable value. The sum of these numbers is located on the Total Points axis, and a line is drawn downwards to the survival axes to determine the likelihood of 1-, 3- and 5-year OS. The calibration curves for predicting OS at (B) 1 years, (C) 3 years and (D) 5 years; predicting RFS at (F) 1 years, (G) 2 years and (H) 3 years. Nomogram-predicted probability of overall survival is plotted on the x axis and actual overall survival is plotted on the y axis. Decision curve analyses depict the clinical net benefit in pairwise comparisons across the different models. Nomogram is compared with the the AJCC 7th edition in terms of (I) 1-, (J) 3- and (K) 5-year OS and (L) 1-, (M) 2- and (N) 3-year RFS. Dashed lines indicate the net benefit of the predictive models across a range of threshold probabilities (black: nomogram; red: TNM stage; green: AGR). The horizontal solid black line represents the assumptions that no patient will experience the event, and the solid grey line represents the assumption that all patients will experience the event. On decision curve analysis, the nomograms showed superior net benefit compared with AJCC 7th edition across a wider range of threshold probabilities.

was based on the AJCC 7th edition [6] and the LCSGJ staging system [7]. The histologic grade of the tumor was defined by the Edmondson–Steiner classification. This study was approved by the Ethics Committee of Zhongshan Hospital and informed consent was waived.

### Follow-up

Post-operative follow-up was carried out every 2 to 4 months after discharge as described in our previous study [24]. Serological tumor biomarkers, abdominal ultrasonography, and chest X-ray were routinely performed during each follow-up. Suspected recurrence or distal metastasis was validated by computed tomography and/or magnetic resonance imaging. The RFS time was defined as time interval between the date of surgery and the date when recurrence was first identified. The OS was calculated from the date of surgery to death. For patients without a documented RFS/OS event, the data were censored at the last follow-up.

### Statistical analysis

The AGR was calculated as the serum albumin level (g/L) divided by GGT level (U/L). Other inflammation-based scores including GAR [23], AAPR [29], NLR [15], PLR [14], PNI [36] and GPR [17] were calculated as previously described. The optimal cut-off values for AGR and abovementioned inflammation-based scores were determined using X-tile version 3.6.1 (Yale University, New Haven, CT, USA).

Statistical analysis was performed by SPSS version 21.0 (SPSS Inc., Chicago, IL, USA) and R project version 2.14.1 (<http://www.r-project.org/>). Differences between groups were analyzed using Pearson Chi-squared test, Fisher's exact test or Mann–Whitney U test as appropriate. The Cox proportional hazard model was used for both univariate analyses and multivariate analyses. The distributions of OS and the RFS were depicted by the Kaplan–Meier method and analyzed by the log-rank test. The discriminatory ability of AGR, other inflammation-based scores and serological tumor markers were evaluated by C-index and time-dependent AUROC. Time-dependent ROC was depicted using KM method via the survival ROC package in R.

Prognostic nomograms integrating traditional staging systems and the AGR were carried out by the rms package in R project. The performance of the nomogram was evaluated by C-index, calibration curve and the DCA as previously described [37].

### CONFLICTS OF INTEREST

No conflicts of interest to declare.

### FINANCIAL SUPPORT

This work was in part supported by the National Key Sci-Tech Special Project of China (Grant No. 2012ZX10002010-001/002); the National Natural Science Foundation of China (Grant No. 81302102 and No. 81173391); Basic Research Programs of Science and Technology Commission Foundation of Shanghai (Grant No. 13JC1401800, XBR2013074 and 13CG04 ).

### REFERENCES

1. Shaib Y, El-Serag HB. The epidemiology of cholangiocarcinoma. *Semin Liver Dis.* 2004; 24:115–125.
2. Khan SA, Thomas HC, Davidson BR, Taylor-Robinson SD. Cholangiocarcinoma. *Lancet.* 2005; 366:1303–1314.
3. West J, Wood H, Logan RF, Quinn M, Aithal GP. Trends in the incidence of primary liver and biliary tract cancers in England and Wales 1971–2001. *Br J Cancer.* 2006; 94:1751–1758.
4. Endo I, Gonen M, Yopp AC, Dalal KM, Zhou Q, Klimstra D, D'Angelica M, DeMatteo RP, Fong Y, Schwartz L, Kemeny N, O'Reilly E, Abou-Alfa GK, et al. Intrahepatic cholangiocarcinoma: rising frequency, improved survival, and determinants of outcome after resection. *Ann Surg.* 2008; 248:84–96.
5. Farges O, Fuks D. Clinical presentation and management of intrahepatic cholangiocarcinoma. *Gastroenterol Clin Biol.* 2010; 34:191–199.
6. Edge SB BD, Compton CC, Fritz AG, Greene FL, Trotti A, editors. *AJCC cancer staging manual* (7th ed). New York, NY:Springer. 2010.
7. Yamasaki S. Intrahepatic cholangiocarcinoma: macroscopic type and stage classification. *J Hepatobiliary Pancreat Surg.* 2003; 10:288–291.
8. Okabayashi T, Yamamoto J, Kosuge T, Shimada K, Yamasaki S, Takayama T, Makuuchi M. A new staging system for mass-forming intrahepatic cholangiocarcinoma: analysis of preoperative and postoperative variables. *Cancer.* 2001; 92:2374–2383.
9. Nathan H, Aloia TA, Vauthey JN, Abdalla EK, Zhu AX, Schulick RD, Choti MA, Pawlik TM. A proposed staging system for intrahepatic cholangiocarcinoma. *Annals of surgical oncology.* 2009; 16:14–22.
10. Farges O, Fuks D, Le Treut YP, Azoulay D, Laurent A, Bachellier P, Nuzzo G, Belghiti J, Pruvot FR, Regimbeau JM. AJCC 7th edition of TNM staging accurately discriminates outcomes of patients with resectable intrahepatic cholangiocarcinoma: By the AFC-IHCC-2009 study group. *Cancer.* 2011; 117:2170–2177.
11. Balkwill F, Mantovani A. Inflammation and cancer: back to Virchow? *Lancet.* 2001; 357:539–545.
12. Hanahan D, Weinberg RA. Hallmarks of cancer: the next generation. *Cell.* 2011; 144:646–674.

13. Bridgewater J, Galle PR, Khan SA, Llovet JM, Park JW, Patel T, Pawlik TM, Gores GJ. Guidelines for the diagnosis and management of intrahepatic cholangiocarcinoma. *J Hepatol*. 2014; 60:1268–1289.
14. Chen Q, Dai Z, Yin D, Yang LX, Wang Z, Xiao YS, Fan J, Zhou J. Negative impact of preoperative platelet-lymphocyte ratio on outcome after hepatic resection for intrahepatic cholangiocarcinoma. *Medicine*. 2015; 94:e574.
15. Chen Q, Yang LX, Li XD, Yin D, Shi SM, Chen EB, Yu L, Zhou ZJ, Zhou SL, Shi YH, Fan J, Zhou J, Dai Z. The elevated preoperative neutrophil-to-lymphocyte ratio predicts poor prognosis in intrahepatic cholangiocarcinoma patients undergoing hepatectomy. *Tumour Biol*. 2015; 36:5283–5289.
16. Everhart JE, Wright EC. Association of gamma-glutamyl transferase (GGT) activity with treatment and clinical outcomes in chronic hepatitis C (HCV). *Hepatology*. 2013; 57:1725–1733.
17. Lemoine M, Shimakawa Y, Nayagam S, Khalil M, Suso P, Lloyd J, Goldin R, Njai HF, Ndow G, Taal M, Cooke G, D'Alessandro U, Vray M, et al. The gamma-glutamyl transpeptidase to platelet ratio (GPR) predicts significant liver fibrosis and cirrhosis in patients with chronic HBV infection in West Africa. *Gut*. 2016; 65:1369–1376.
18. Lim JS, Yang JH, Chun BY, Kam S, Jacobs DR, Jr, Lee DH. Is serum gamma-glutamyltransferase inversely associated with serum antioxidants as a marker of oxidative stress? *Free Radic Biol Med*. 2004; 37:1018–1023.
19. Fentiman IS. Gamma-glutamyl transferase: risk and prognosis of cancer. *Br J Cancer*. 2012; 106:1467–1468.
20. Polterauer S, Hofstetter G, Grimm C, Rahhal J, Mailath-Pokorny M, Kohl M, Concin N, Tempfer C, Marth C, Reinthaller A. Relevance of gamma-glutamyltransferase—a marker for apoptotic balance—in predicting tumor stage and prognosis in cervical cancer. *Gynecol Oncol*. 2011; 122:590–594.
21. Seebacher V, Polterauer S, Grimm C, Rahhal J, Hofstetter G, Bauer EM, Husslein H, Leipold H, Marth C, Reinthaller A, Concin N. Prognostic significance of gamma-glutamyltransferase in patients with endometrial cancer: a multi-centre trial. *Br J Cancer*. 2012; 106:1551–1555.
22. Ma H, Zhang L, Tang B, Wang Y, Chen R, Zhang B, Chen Y, Ge N, Wang Y, Gan Y, Ye S, Ren Z. gamma-Glutamyltranspeptidase is a prognostic marker of survival and recurrence in radiofrequency-ablation treatment of hepatocellular carcinoma. *Annals of surgical oncology*. 2014; 21:3084–3089.
23. Ju MJ, Qiu SJ, Fan J, Zhou J, Gao Q, Cai MY, Li YW, Tang ZY. Preoperative serum gamma-glutamyl transferase to alanine aminotransferase ratio is a convenient prognostic marker for Child-Pugh A hepatocellular carcinoma after operation. *J Gastroenterol*. 2009; 44:635–642.
24. Yin X, Zheng SS, Zhang BH, Zhou Y, Chen XH, Ren ZG, Qiu SJ, Fan J. Elevation of serum gamma-glutamyltransferase as a predictor of aggressive tumor behaviors and unfavorable prognosis in patients with intrahepatic cholangiocarcinoma: analysis of a large monocenter study. *European journal of gastroenterology & hepatology*. 2013; 25:1408–1414.
25. Don BR, Kaysen G. Serum albumin: relationship to inflammation and nutrition. *Semin Dial*. 2004; 17:432–437.
26. Moshage HJ, Janssen JA, Franssen JH, Hafkenscheid JC, Yap SH. Study of the molecular mechanism of decreased liver synthesis of albumin in inflammation. *The Journal of clinical investigation*. 1987; 79:1635–1641.
27. Moriarty-Craige SE, Jones DP. Extracellular thiols and thiol/disulfide redox in metabolism. *Annu Rev Nutr*. 2004; 24:481–509.
28. Taverna M, Marie AL, Mira JP, Guidet B. Specific antioxidant properties of human serum albumin. *Ann Intensive Care*. 2013; 3:4.
29. Chan AW, Chan SL, Mo FK, Wong GL, Wong VW, Cheung YS, Chan HL, Yeo W, Lai PB, To KF. Albumin-to-alkaline phosphatase ratio: a novel prognostic index for hepatocellular carcinoma. *Disease markers*. 2015; 2015:564057.
30. Danan D, Shonka DC, Jr., Selman Y, Chow Z, Smolkin ME, Jameson MJ. Prognostic value of albumin in patients with head and neck cancer. *Laryngoscope*. 2016; 126:1567–1571.
31. Tanriverdi O, Avci N, Oktay E, Kalemci S, Pilanci KN, Cokmert S, Menekse S, Kocar M, Sen CA, Akman T, Ordu C, Goksel G, Meydan N, et al. Pretreatment Serum Albumin Level is an Independent Prognostic Factor in Patients with Stage IIIB Non-Small Cell Lung Cancer: A Study of the Turkish Descriptive Oncological Researches Group. *Asian Pacific journal of cancer prevention*. 2015; 16:5971–5976.
32. Kinoshita A, Onoda H, Imai N, Iwaku A, Oishi M, Tanaka K, Fushiya N, Koike K, Nishino H, Matsushima M. The C-reactive protein/albumin ratio, a novel inflammation-based prognostic score, predicts outcomes in patients with hepatocellular carcinoma. *Annals of surgical oncology*. 2015; 22:803–810.
33. Nojiri S, Joh T. Albumin suppresses human hepatocellular carcinoma proliferation and the cell cycle. *Int J Mol Sci*. 2014; 15:5163–5174.
34. Johnson PJ, Berhane S, Kagebayashi C, Satomura S, Teng M, Reeves HL, O'Beirne J, Fox R, Skowronska A, Palmer D, Yeo W, Mo F, Lai P, et al. Assessment of liver function in patients with hepatocellular carcinoma: a new evidence-based approach-the ALBI grade. *J Clin Oncol*. 2015; 33:550–558.
35. Wang YY, Zhong JH, Su ZY, Huang JF, Lu SD, Xiang BD, Ma L, Qi LN, Ou BN, Li LQ. Albumin-bilirubin versus Child-Pugh score as a predictor of outcome after liver resection for hepatocellular carcinoma. *Br J Surg*. 2016.
36. Pinato DJ, North BV, Sharma R. A novel, externally validated inflammation-based prognostic algorithm in hepatocellular carcinoma: the prognostic nutritional index (PNI). *Br J Cancer*. 2012; 106:1439–1445.

37. Vickers AJ, Elkin EB. Decision curve analysis: a novel method for evaluating prediction models. *Med Decis Making*. 2006; 26:565–574.
38. Seitz HK, Stickel F. Risk factors and mechanisms of hepatocarcinogenesis with special emphasis on alcohol and oxidative stress. *Biol Chem*. 2006; 387:349–360.
39. Aishima S, Fujita N, Mano Y, Iguchi T, Taketomi A, Maehara Y, Oda Y, Tsuneyoshi M. p62+ Hyaline inclusions in intrahepatic cholangiocarcinoma associated with viral hepatitis or alcoholic liver disease. *Am J Clin Pathol*. 2010; 134:457–465.
40. Arroyo V, Garcia-Martinez R, Salvatella X. Human serum albumin, systemic inflammation, and cirrhosis. *J Hepatol*. 2014; 61:396–407.
41. Zhou T, He X, Fang W, Zhan J, Hong S, Qin T, Ma Y, Sheng J, Zhou N, Zhao Y, Huang Y, Zhang L. Pretreatment Albumin/Globulin Ratio Predicts the Prognosis for Small-Cell Lung Cancer. *Medicine*. 2016; 95:e3097.
42. Wang Y, Li J, Xia Y, Gong R, Wang K, Yan Z, Wan X, Liu G, Wu D, Shi L, Lau W, Wu M, Shen F. Prognostic nomogram for intrahepatic cholangiocarcinoma after partial hepatectomy. *J Clin Oncol*. 2013; 31:1188–1195.
43. Hyder O, Marques H, Pulitano C, Marsh JW, Alexandrescu S, Bauer TW, Gamblin TC, Sotiropoulos GC, Paul A, Barroso E, Clary BM, Aldrighetti L, Ferrone CR, et al. A nomogram to predict long-term survival after resection for intrahepatic cholangiocarcinoma: an Eastern and Western experience. *JAMA Surg*. 2014; 149:432–438.
44. Fu YP, Ni XC, Yi Y, Cai XY, He HW, Wang JX, Lu ZF, Han X, Cao Y, Zhou J, Fan J, Qiu SJ. A Novel and Validated Inflammation-Based Score (IBS) Predicts Survival in Patients With Hepatocellular Carcinoma Following Curative Surgical Resection: A STROBE-Compliant Article. *Medicine*. 2016; 95:e2784.
